# Supplementary material for: The Vulvar Cancer Risk in Differentiated Vulvar Intraepithelial Neoplasia: A Systematic Review
Source: MDPI journal article supplement (doi:10.3390/cancers13246170), 2021-12-07
Supplement: s1 [file s1]

# Supplementary Materials: The Vulvar Cancer Risk in Differentiated Vulvar Intraepithelial Neoplasia: A Systematic Review

Féline O. Voss, Nikki B. Thuijs, Ravi F. M. Vermeulen, Erica A. Wilthagen, Marc van Beurden and Maaike C. G. Bleeker

**Table S1.** Search strategy for each database.

| Database      | Search strategy                                                                                                                                                                                                |
|---------------|----------------------------------------------------------------------------------------------------------------------------------------------------------------------------------------------------------------|
| Medline       | (differentiated or HPV-independent).ti,ab,kf. and ((exp vulvar Neoplasms/ and exp Carcinoma in Situ/) or ("vulvar intraepithelial" or "vulval intraepithelial" or VIN).ti,ab,kf.) or (dVIN or d-VIN).ti,ab,kf. |
| Embase (Ovid) | (differentiated or HPV-independent).ti,ab,kw. and ((exp vulva tumor/ and exp carcinoma in situ/) or ("vulvar intraepithelial" or "vulval intraepithelial" or VIN).ti,ab,kw.) or (dVIN or d-VIN).ti,ab,kw.      |
| Scopus        | TITLE-ABS-KEY(((differentiated or HPV-independent) and ("vulvar intraepithelial" or "vulval intraepithelial" or VIN)) or dVIN or d-VIN)                                                                        |
